# Supplementary material
Source: PubMed Central journal article supplement (PMC3931549)
Supplement: NIHMS500330-supplement-supplement_1.pdf [file NIHMS500330-supplement-supplement_1.pdf]

## Appendix. Participant Characteristics

## Supplement Table A. Demographics and Health History

| Participant   | Sex      | Age at Scan (Yrs) | Family History (self-reported)     |                                     |                                        |
|---------------|----------|-------------------|------------------------------------|-------------------------------------|----------------------------------------|
|               |          |                   | Autism or Autism Spectrum Disorder | Language Impairment or Speech Delay | Learning Disability or Cognitive Delay |
| <b>Case 1</b> | <b>F</b> | <b>15.4</b>       | <b>No</b>                          | <b>No</b>                           | <b>Yes</b>                             |
| Control 1     | F        | 15.6              | No                                 | No                                  | No                                     |
| <b>Case 2</b> | <b>M</b> | <b>7.7, 8.0</b>   | <b>No</b>                          | <b>Yes</b>                          | <b>No</b>                              |
| Control 2     | M        | 8.8               | No                                 | No                                  | No                                     |
| <b>Case 3</b> | <b>M</b> | <b>6.5</b>        | <b>Yes</b>                         | <b>No</b>                           | <b>No</b>                              |
| Control 3     | M        | 7.8               | No                                 | Yes                                 | No                                     |
| <b>Case 4</b> | <b>M</b> | <b>12.7</b>       | <b>Yes</b>                         | <b>Yes</b>                          | <b>Yes</b>                             |
| Control 4     | M        | 13.0              | No                                 | No                                  | No                                     |
| <b>Case 5</b> | <b>F</b> | <b>12.9</b>       | <b>Yes</b>                         | <b>Yes</b>                          | <b>Yes</b>                             |
| Control 5     | F        | 13.8              | No                                 | No                                  | No                                     |
| <b>Case 6</b> | <b>M</b> | <b>18.4</b>       | <b>Yes</b>                         | <b>Yes</b>                          | <b>Yes</b>                             |
| Control 6     | M        | 18.3              | No                                 | No                                  | No                                     |

## Supplement Table B. Mitochondrial Phenotype and Diagnosis

| Participant   | Characteristics and Workup That Suggest Mitochondrial Concerns                                          | Final Mitochondrial Diagnosis |
|---------------|---------------------------------------------------------------------------------------------------------|-------------------------------|
| <b>Case 1</b> | Myopathy, subsequently confirmed complex IV deficiency                                                  | Definite                      |
| <b>Case 2</b> | Lactic acidemia, abnormal organic acids, and abnormal polarography                                      | Definite                      |
| <b>Case 3</b> | Hypotonia. (Subsequently confirmed mitochondrial proliferation on biopsy, elevated plasma alanine)      | Probable                      |
| <b>Case 4</b> | Hypotonia. (Subsequently confirmed mitochondrial proliferation on biopsy, abnormal urine organic acids) | Possible                      |
| <b>Case 5</b> | History of developmental regression and autism in younger brother                                       | Possible                      |
| <b>Case 6</b> | Myopathy, elevated CPK and +FH in a maternal uncle                                                      | Possible                      |

**Supplement Table C. Participant Autism Diagnostic Observation Scales<sup>1</sup>**

| Participant   | Module   | COM      | SOC       | COM+<br>SOC | IC       | SBRI     | Overall Diagnosis               |
|---------------|----------|----------|-----------|-------------|----------|----------|---------------------------------|
| <b>Case 1</b> | <b>3</b> | <b>5</b> | <b>14</b> | <b>19</b>   | <b>2</b> | <b>2</b> | <b>Autism; GAD /SAD</b>         |
| Control 1     | 3        | 1        | 0         | 0           | 1        | 0        | No Diagnosis                    |
| <b>Case 2</b> | <b>2</b> | <b>4</b> | <b>9</b>  | <b>13</b>   | <b>1</b> | <b>3</b> | <b>Autism; SAD</b>              |
| Control 2     | 3        | 2        | 2         | 4           | 1        | 0        | No Diagnosis                    |
| <b>Case 3</b> | <b>3</b> | <b>3</b> | <b>7</b>  | <b>10</b>   | <b>1</b> | <b>5</b> | <b>Autism</b>                   |
| Control 3     | 3        | 0        | 1         | 1           | 0        | 0        | No Diagnosis                    |
| <b>Case 4</b> | <b>3</b> | <b>1</b> | <b>10</b> | <b>11</b>   | <b>0</b> | <b>0</b> | <b>Autism</b>                   |
| Control 4     | 3        | 0        | 2         | 2           | 0        | 0        | No Diagnosis                    |
| <b>Case 5</b> | <b>3</b> | <b>2</b> | <b>8</b>  | <b>10</b>   | <b>0</b> | <b>1</b> | <b>Autism</b>                   |
| Control 5     | 3        | 1        | 1         | 2           | 0        | 0        | No Diagnosis                    |
| <b>Case 6</b> | <b>4</b> | <b>3</b> | <b>4</b>  | <b>7</b>    | <b>0</b> | <b>2</b> | <b>ASD; Asperger's Syndrome</b> |
| Control 6     | 4        | 3        | 1         | 4           | 1        | 0        | No Diagnosis                    |

COM - Communication Domain. SOC - Social Interaction Domain. IC - Imagination/ Creativity Domain. SBRI - Stereotyped Behaviors and Restricted Interests Domain. GAD - Generalized Anxiety Disorder. SAD - Social Anxiety Disorder.

*Module 2* Autism/Autism Spectrum cut-offs for Communication (scores 0-10), Social Interaction (scores 0-14), and Communication + Social Interaction (scores 0-24) domains are 5/3, 6/4, and 12/8, respectively. Imagination/ Creativity Domain (scores 0-2); Stereotyped Behaviors and Restricted Interests Domain (scores 0-6).

*Module 3, 4* Autism/Autism Spectrum cut-offs for Communication (scores 0-8), Social Interaction (scores 0-14), and Communication + Social Interaction (scores 0-22) domains are 3/2, 6/4, and 10/7, respectively. Imagination/ Creativity Domain (scores 0-2); Stereotyped Behaviors and Restricted Interests Domain (scores 0-8).

**Supplement Table D. Participant Autism Diagnostic Interview-Revised<sup>2</sup> Scores (Version 4 Years, 0 Months or More)**

| Participant   | Autism Diagnostic Interview-Revised       |                                            |                                                |                                             | D Total (1) |
|---------------|-------------------------------------------|--------------------------------------------|------------------------------------------------|---------------------------------------------|-------------|
|               | Social Interaction Total Scores 0-30 (10) | Communication Verbal Total Scores 0-26 (8) | Communication Non-Verbal Total Scores 0-14 (7) | Stereotyped Behaviors Total Scores 0-12 (3) |             |
| <b>Case 1</b> | <b>17</b>                                 | <b>N/A</b>                                 | <b>8</b>                                       | <b>2</b>                                    | <b>3</b>    |
| Control 1     | 1                                         | 1                                          | 1                                              | 0                                           | 0           |
| <b>Case 2</b> | <b>20</b>                                 | <b>14</b>                                  | <b>8</b>                                       | <b>6</b>                                    | <b>4</b>    |
| Control 2     | 2                                         | 4                                          | 3                                              | 0                                           | 0           |
| <b>Case 3</b> | <b>17</b>                                 | <b>19</b>                                  | <b>11</b>                                      | <b>6</b>                                    | <b>5</b>    |
| Control 3     | 2                                         | 1                                          | 1                                              | 2                                           | 0           |
| <b>Case 4</b> | <b>18</b>                                 | <b>22</b>                                  | <b>11</b>                                      | <b>7</b>                                    | <b>5</b>    |
| Control 4     | 1                                         | 1                                          | 1                                              | 0                                           | 0           |
| <b>Case 5</b> | <b>14</b>                                 | <b>6</b>                                   | <b>2</b>                                       | <b>4</b>                                    | <b>3</b>    |
| Control 5     | 0                                         | 0                                          | 0                                              | 0                                           | 2           |
| <b>Case 6</b> | <b>17</b>                                 | <b>9</b>                                   | <b>4</b>                                       | <b>7</b>                                    | <b>3</b>    |
| Control 6     | 0                                         | 2                                          | 2                                              | 0                                           | 0           |

D= Abnormality of Development Evident at or Before 36 Months (Autism cut-off)

## References

1. Lord C, Risi S, Lambrecht L, et al. The autism diagnostic observation schedule-generic: a standard measure of social and communication deficits associated with the spectrum of autism. *J Autism Dev Disord.* Jun 2000;30(3):205-223.
2. Lord C, Rutter M, Le Couteur A. Autism Diagnostic Interview-Revised: a revised version of a diagnostic interview for caregivers of individuals with possible pervasive developmental disorders. *J Autism Dev Disord.* Oct 1994;24(5):659-685.
